# Supplementary material for: A cycloruthenated 2-phenylimidazole: chromogenic sensor for nitrite in acidic buffer and fluoride in CH3CN
Source: Royal Society of Chemistry journal article supplement (doi:10.1039/d2nj05227j), 2023-01-01
Supplement: d2nj05227j1.pdf [file d2nj05227j1.pdf]

## Supporting information

### A Cycloruthenated 2-Phenylimidazole: Chromogenic Sensor for Nitrite in Acidic buffer and Fluoride in CH<sub>3</sub>CN

Zhen Li <sup>a</sup>, Yirong Wang <sup>a</sup>, Ce Xu <sup>b</sup>, Xianghong Li <sup>a, b, \*</sup>, Bingguang Zhang <sup>a, b</sup>

<sup>a</sup> Key Laboratory of Analytical Chemistry of State Ethnic affairs Commission, South-Central Minzu University, Wuhan 430074, P. R. China.

<sup>b</sup> Key Laboratory of Catalysis and Energy Materials Chemistry of Ministry of Education & Hubei Key Laboratory of Catalysis and Materials Science, South-Central Minzu University, Wuhan 430074, China

\* Corresponding author, Email: [lixhchem@mail.scuec.edu.cn](mailto:lixhchem@mail.scuec.edu.cn)

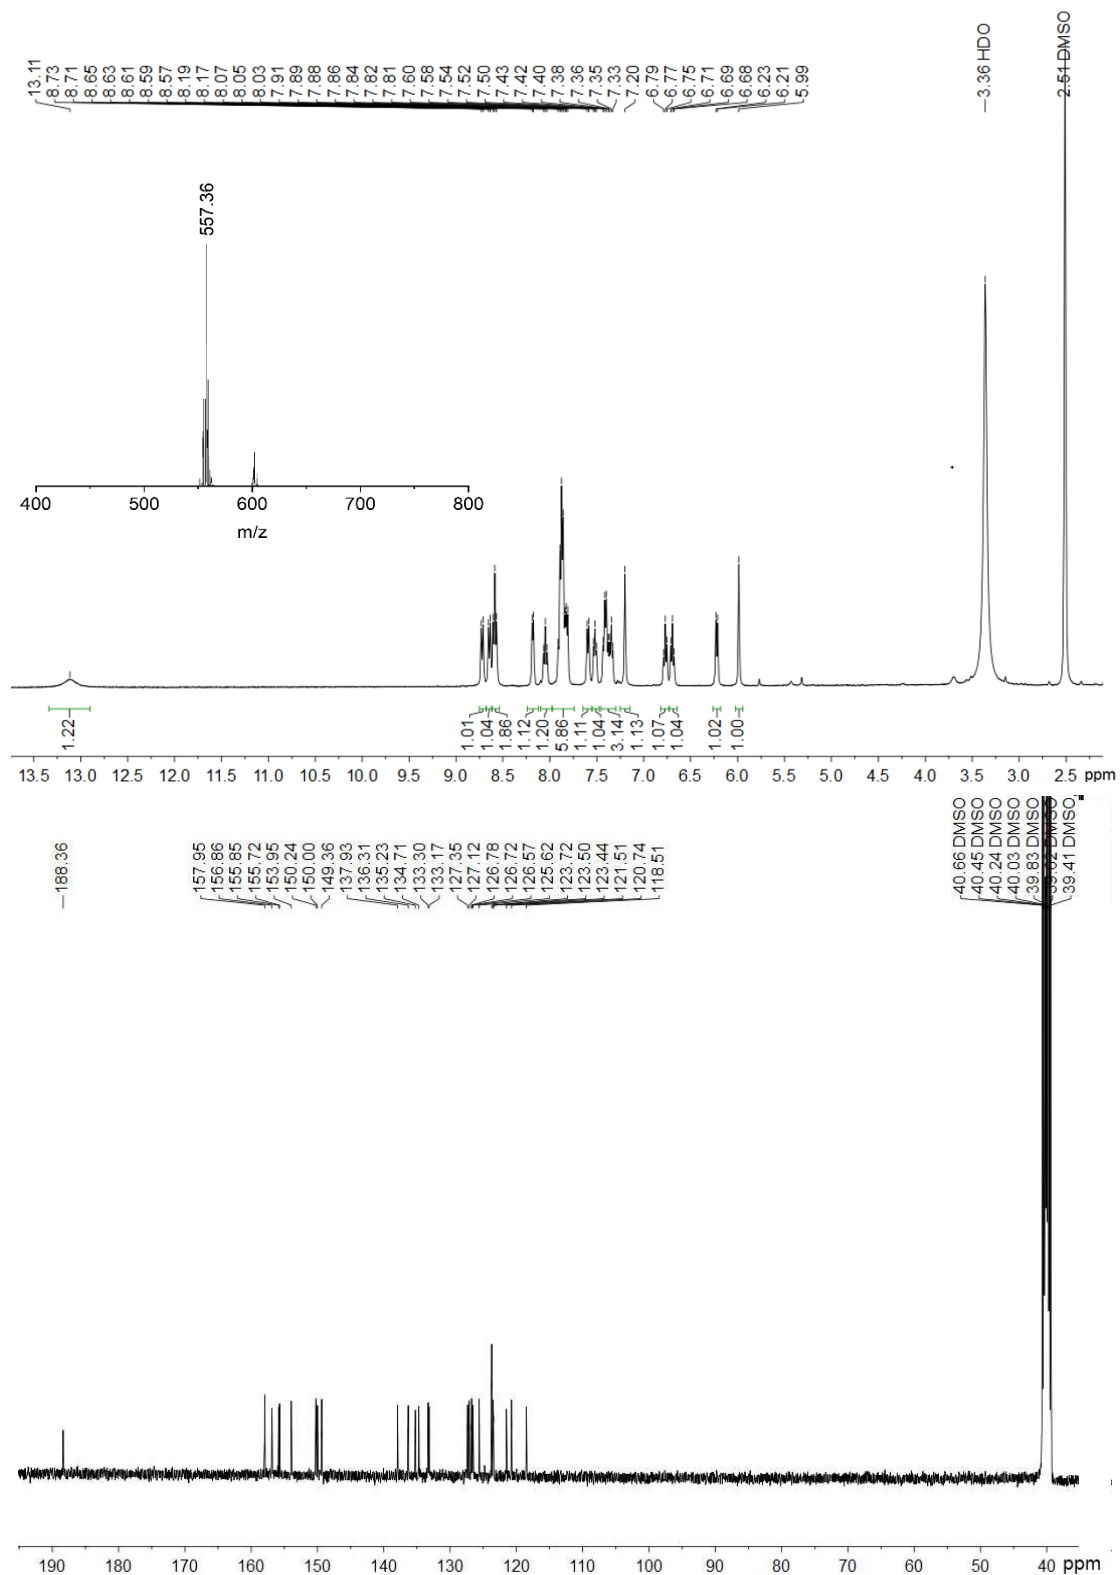

Figure S1 NMR spectra of the complex in DMSO-d<sub>6</sub>. Inset: The MS spectra of the complex 1

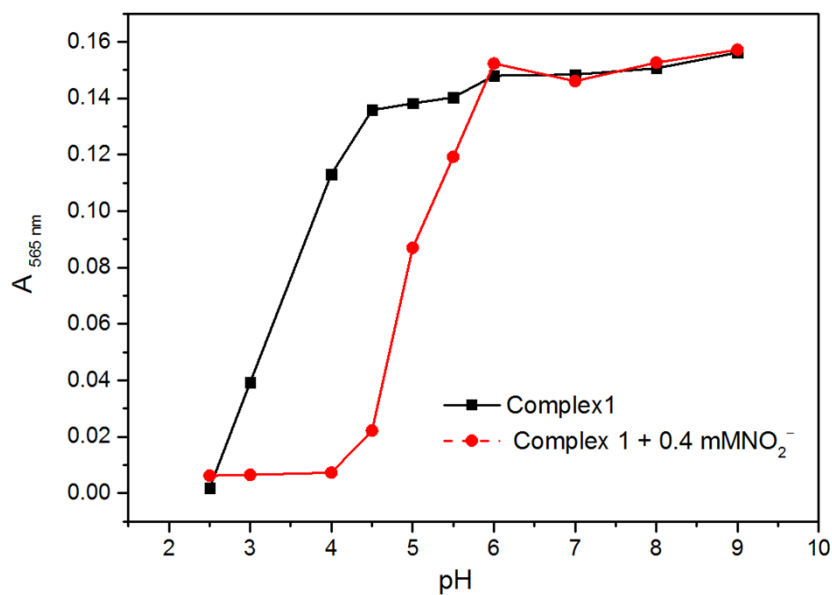

Figure S2. pH Dependence of the absorption intensity of the complex in the absence and presence of  $\text{NO}_2^-$  in  $\text{CH}_3\text{CN}/\text{B-R}$  buffer ( $V/V=1:9$ ) after being incubated for 20 min.

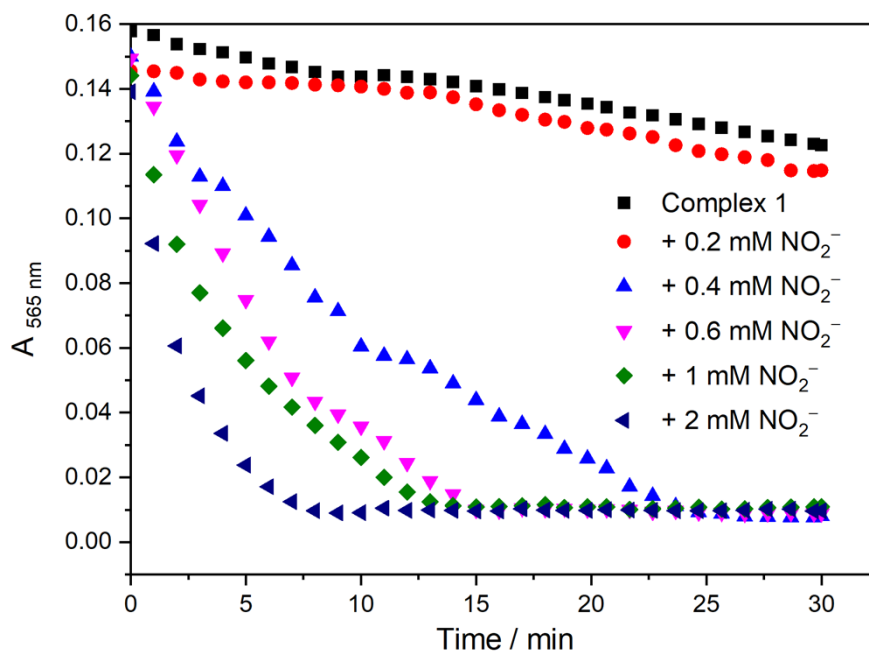

Figure S3. Time-dependent absorption intensity changes at 565 nm of the complex in  $\text{CH}_3\text{CN}/\text{BR}$  buffer ( $V/V=1:9$ , pH 4.50) upon addition of nitrite in various amounts.

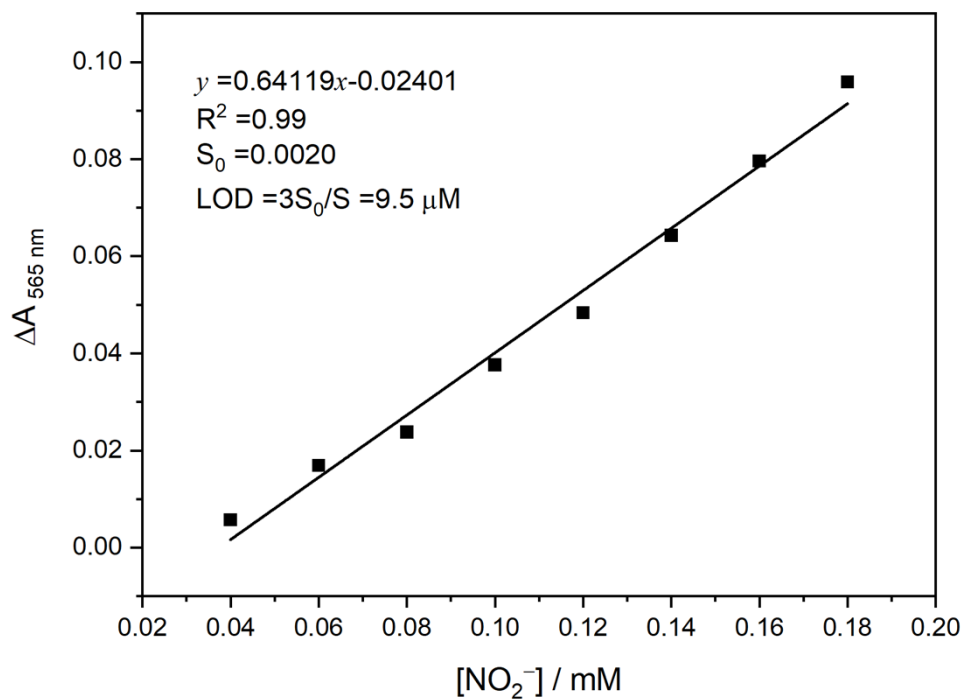

Figure S4. The linear relationship between the complex and concentrations of nitrite.

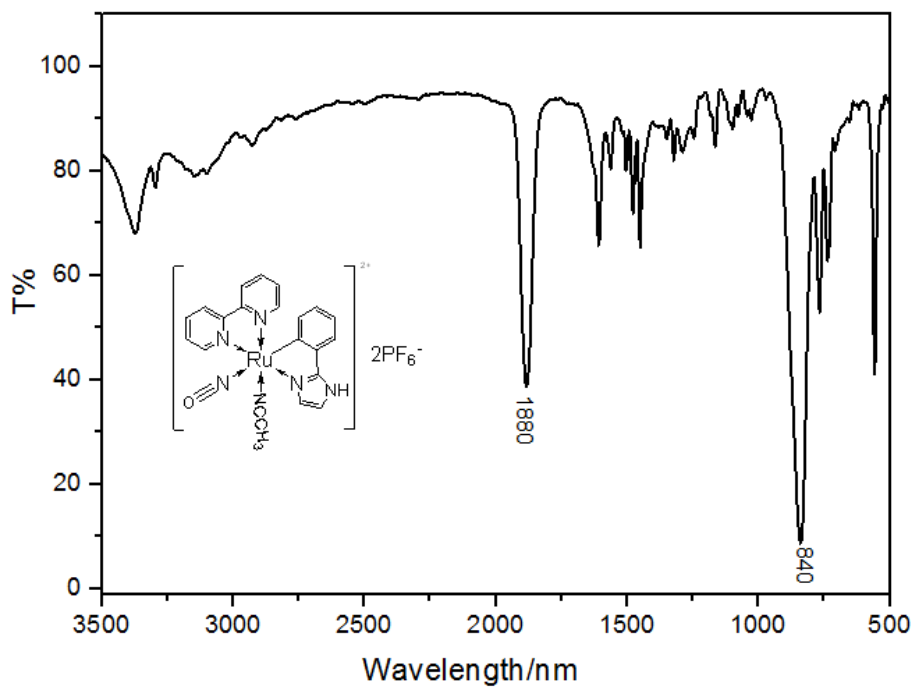

Figure S5. The FT-IR spectrum of the complex from the reaction between **1** and nitrite in acidic buffer.

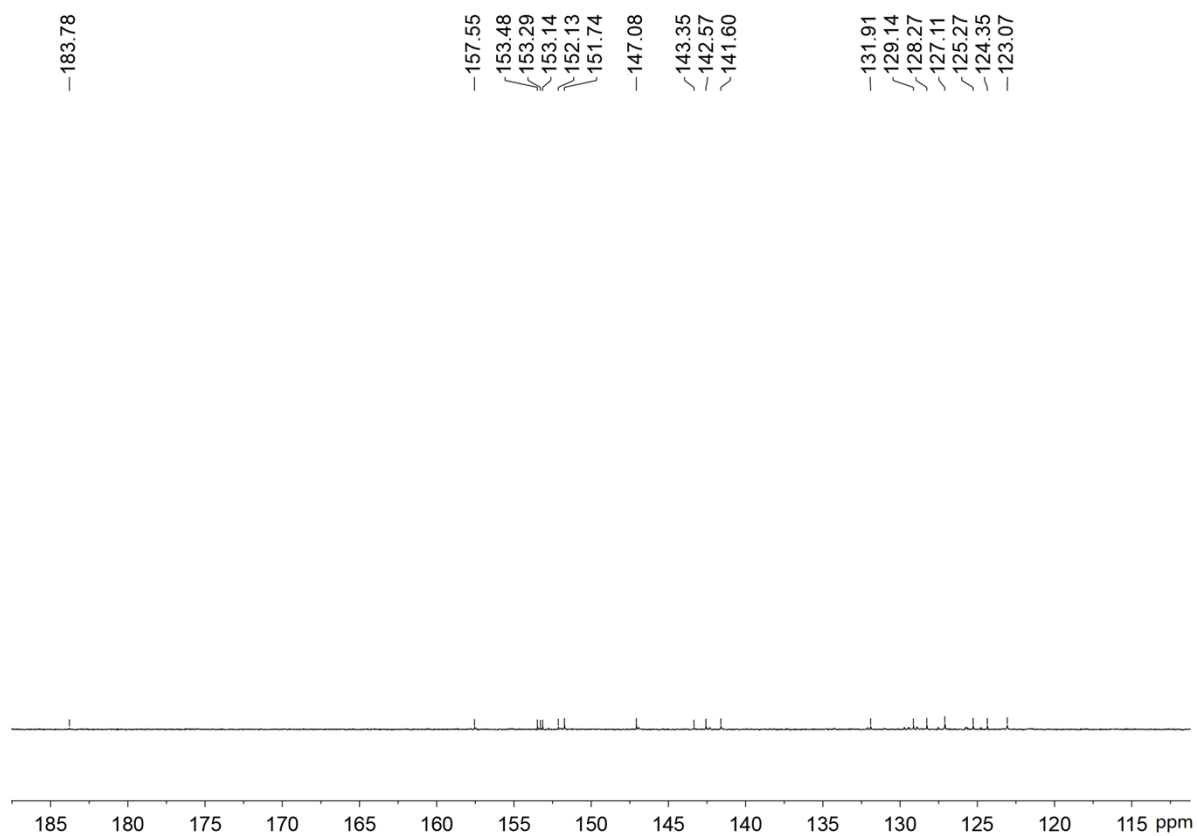

Figure S6.  $^{13}\text{C}$  NMR spectrum of the nitrosyl complex in  $\text{DMSO-d}_6$ .

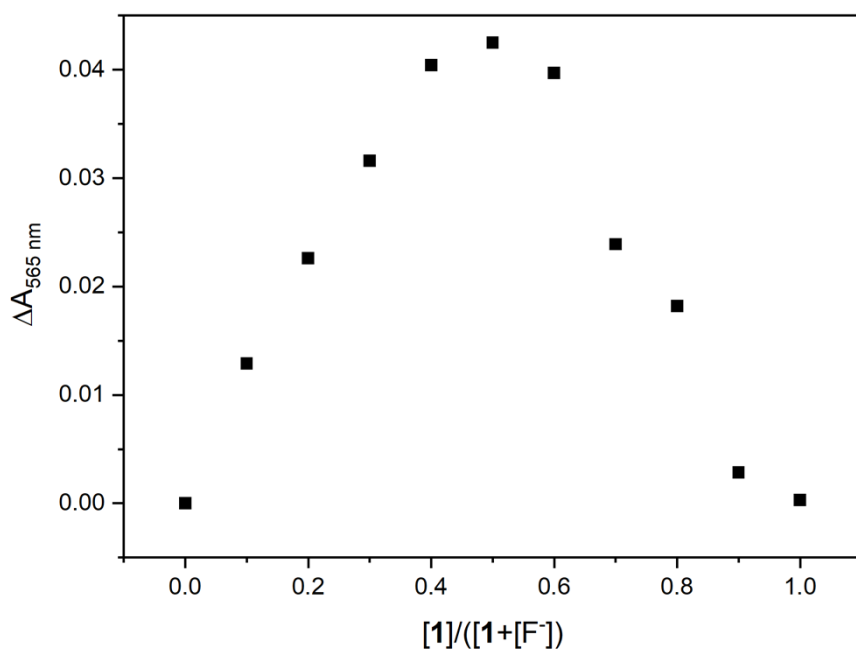

Figure S7. Job's plot for the complex **1** and  $\text{F}^-$ . Herein,  $[\mathbf{1}]+[\text{F}^-]=4.0 \times 10^{-5}$  mol/L.

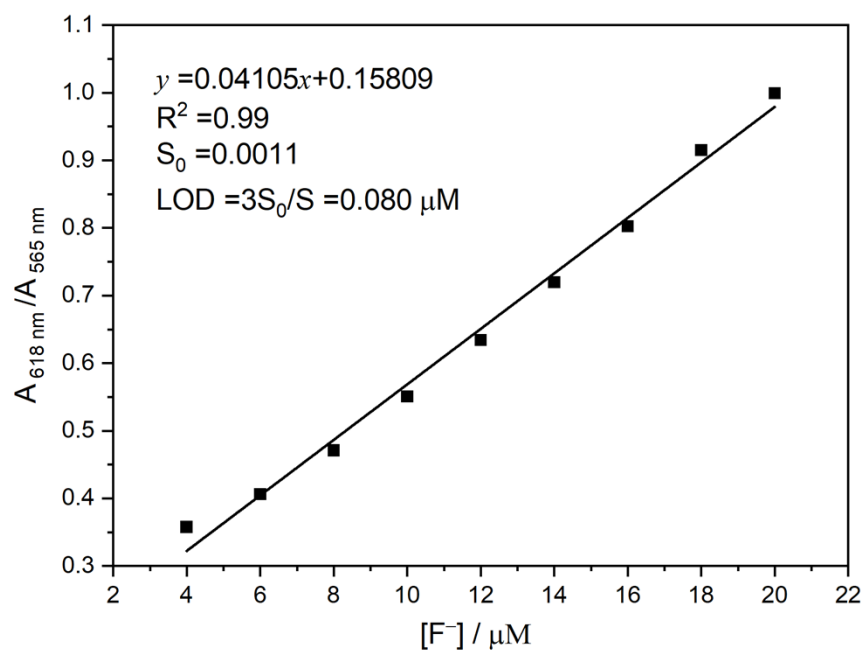

Figure S8. The sensitivity test of **1** towards F<sup>-</sup> using UV–Vis absorption technique.

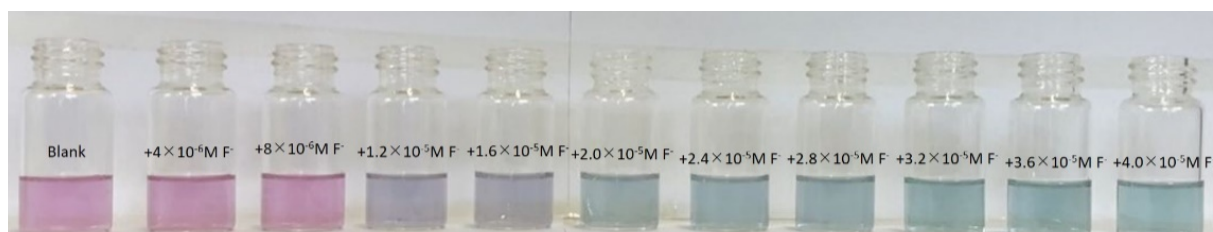

Figure S9. The photos of the complex **1** (20 μM) in CH<sub>3</sub>CN upon addition of different concentrations of fluoride.

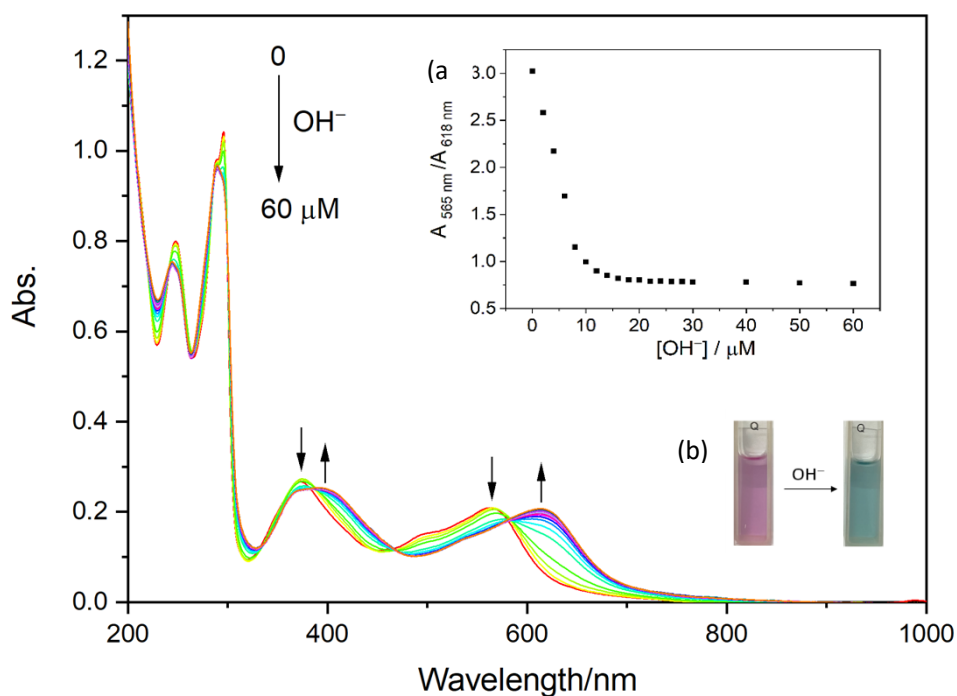

Figure S10. The absorption spectral changes of the complex **1** (20 μM) in CH<sub>3</sub>CN upon addition of hydroxide. Each spectrum was recorded in a 2 min delay. Inset: (a) The titration curve of fluoride for the complex; (b) The photograph of the complex in CH<sub>3</sub>CN in the presence or absence of hydroxide.

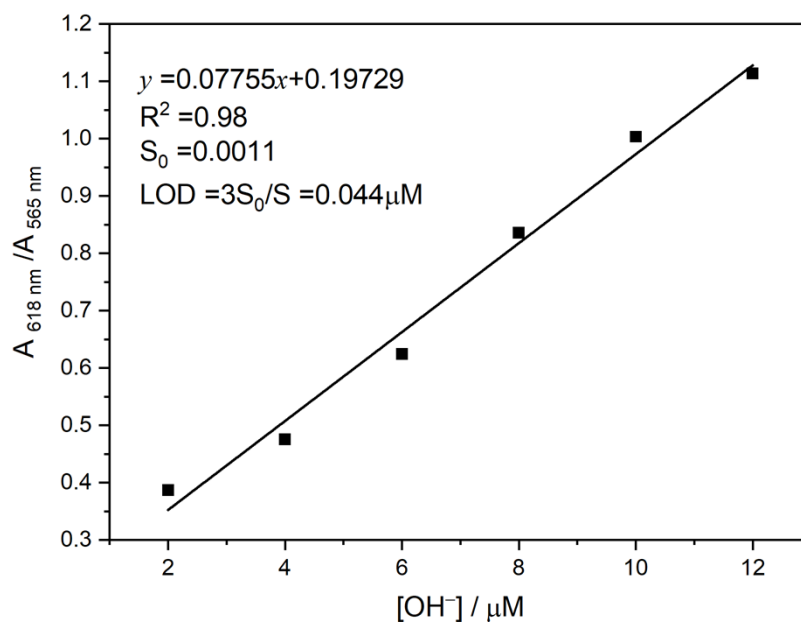

Figure S11. The sensitivity test of **1** towards OH<sup>-</sup> using UV-Vis absorption technique.

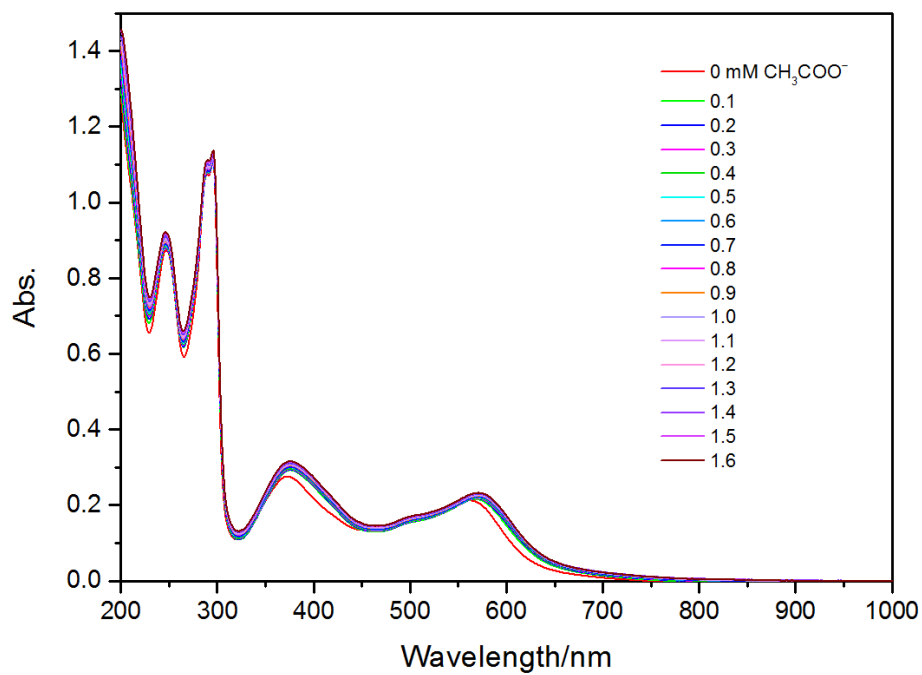

Figure S12. The absorption spectral changes of the complex 1 (20 μM) in CH<sub>3</sub>CN upon addition of hydroxide. Each spectrum was recorded in a 2 min delay.
